# Supplementary material
Source: publisher figshare collection journal article supplement (https://acs.figshare.com/ndownloader/files/3973672)
Supplement: Supplementary file 1 [file 3973672]

# Pt@Nb-TiO<sub>2</sub> Catalyst Membranes Fabricated by Electrospinning and Atomic Layer Deposition

Qing Du,<sup>1</sup> Jianbo Wu,<sup>2</sup> and Hong Yang<sup>2,\*</sup>

<sup>1</sup> Department of Chemical Engineering, University of Rochester, Rochester, NY 14627

<sup>2</sup> Department of Chemical and Biomolecular Engineering, University of Illinois at Urbana-Champaign, 114 Roger Adams Laboratory, MC-712, 600 S. Mathews Avenue, Urbana, IL 61801

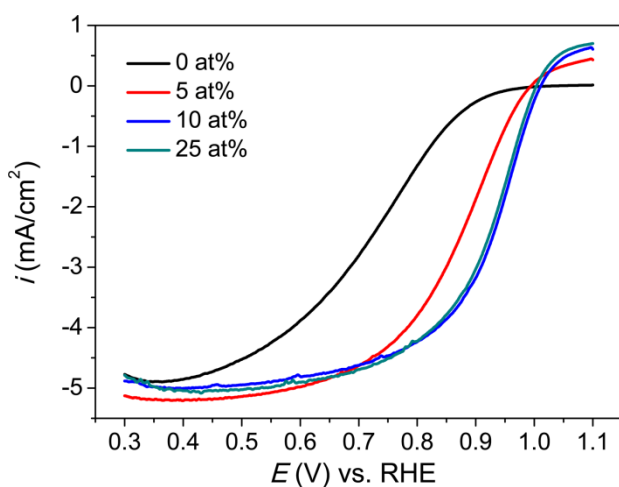

**Figure S1.** ORR polarization curves of Pt@Nb-TiO<sub>2</sub> catalysts with different amounts of Nb in the ceramic fibers.
